# Supplementary material for: The vital role of ditopic N–N bridging ligands with different lengths in the formation of new binuclear dioxomolybdenum(vi) complexes: synthesis, crystal structures, supramolecular framework and protein binding studies
Source: Royal Society of Chemistry journal article supplement (doi:10.1039/d0nj03702h), 2020-01-01
Supplement: d0nj03702h1.pdf [file d0nj03702h1.pdf]

New Journal of Chemistry

Electronic Supplementary Information

**The vital role of ditopic N-N bridging ligands with different lengths in the formation of new binuclear dioxomolybdenum(VI) complexes: Synthesis, crystal structures, supramolecular framework and protein binding studies**

Debanjana Biswal<sup>a</sup>, Malini Roy<sup>a</sup>, Nikhil Ranjan Pramanik<sup>\*b</sup>, Suwendu Paul<sup>c</sup>, Michael G. B Drew<sup>d</sup>, Syamal Chakrabarti<sup>\*a</sup>

<sup>a</sup>*Department of Chemistry, University College of Science, 92, Acharya Prafulla Chandra Road, Kolkata:700009, West Bengal, India.*

<sup>b</sup>*Department of Chemistry, Bidhannagar College, EB-2, Sector1, Salt Lake, Kolkata: 700064, India.*

<sup>c</sup>*Department of Chemistry, University of Kalyani, Kalyani, Nadia, West Bengal- 741235, India.*

<sup>d</sup>*Department of Chemistry, The University of Reading, Whiteknights, Reading RG6 6AD, UK.*

---

**Table of Contents:**

**Fig. S1:** IR spectra of (a) complex 1, (b) complex 2, (c) complex 3 and (d) complex 4 in KBr pellets.

**Fig. S2:** UV-Vis spectra of (a) complex 1, (b) complex 2, (c) complex 3 and (d) complex 4 in CH<sub>2</sub>Cl<sub>2</sub> at 298 K.

**Fig. S3:** Cyclic voltammograms of (a) complex 2, (b) complex 3 and (c) complex 4 in DMF at 298K.

**Fig. S4:** Hirshfeld surface plots of (a) complex 1, (b) complex 2 and (c) complex 3 mapped with  $d_{\text{norm}}$ .

**Fig. S5:** Frontier orbitals of (a) complex 1, (b) complex 2, (c) complex 3 and (d) complex 4.

**Fig. S6:** TG-DTA curves for (a) complex 1, (b) complex 2, (c) complex 3 and (d) complex 4.

**Fig. S7:** Overlap of emission spectra of BSA and absorption spectra of (a) complex 1, (b) complex 2 and (c) complex 4.

**Fig. S8:** Molecular docking images of (a) complex 2, (b) complex 3 and (c) complex 4 with

BSA, residues surrounding the binding sites is highlighted.

**Table S1:** Fingerprint plots of complex 1

**Table S2:** Fingerprint plots of complex 2

**Table S3:** Fingerprint plots of complex 3

**Table S4:** Fingerprint plots of complex 4

**Table S5:** Hirshfeld surface volume and surface area of complexes 1-4

**Table S6:** Förster Resonance Energy Transfer (FRET) parameters for the ligand and the complexes 1-4 with BSA

**Table S7:** Results of molecular docking: Adjacent residues and hydrogen bonding interactions

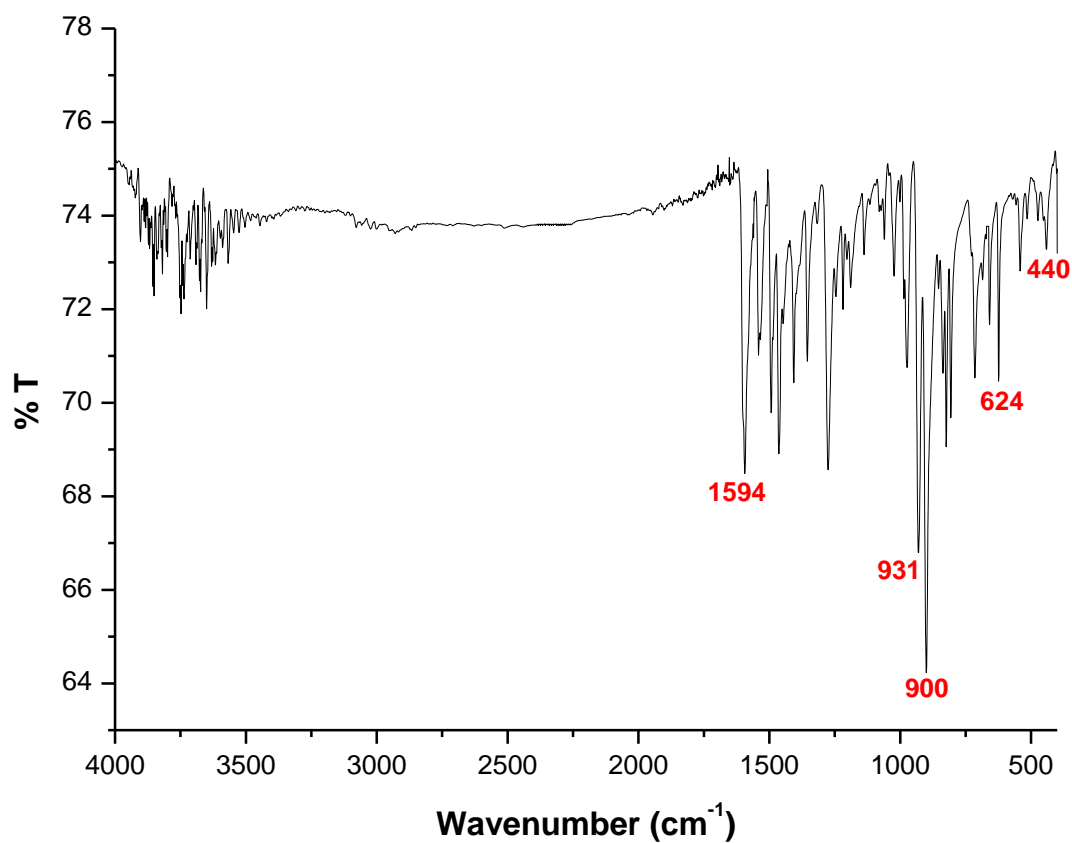

(a)

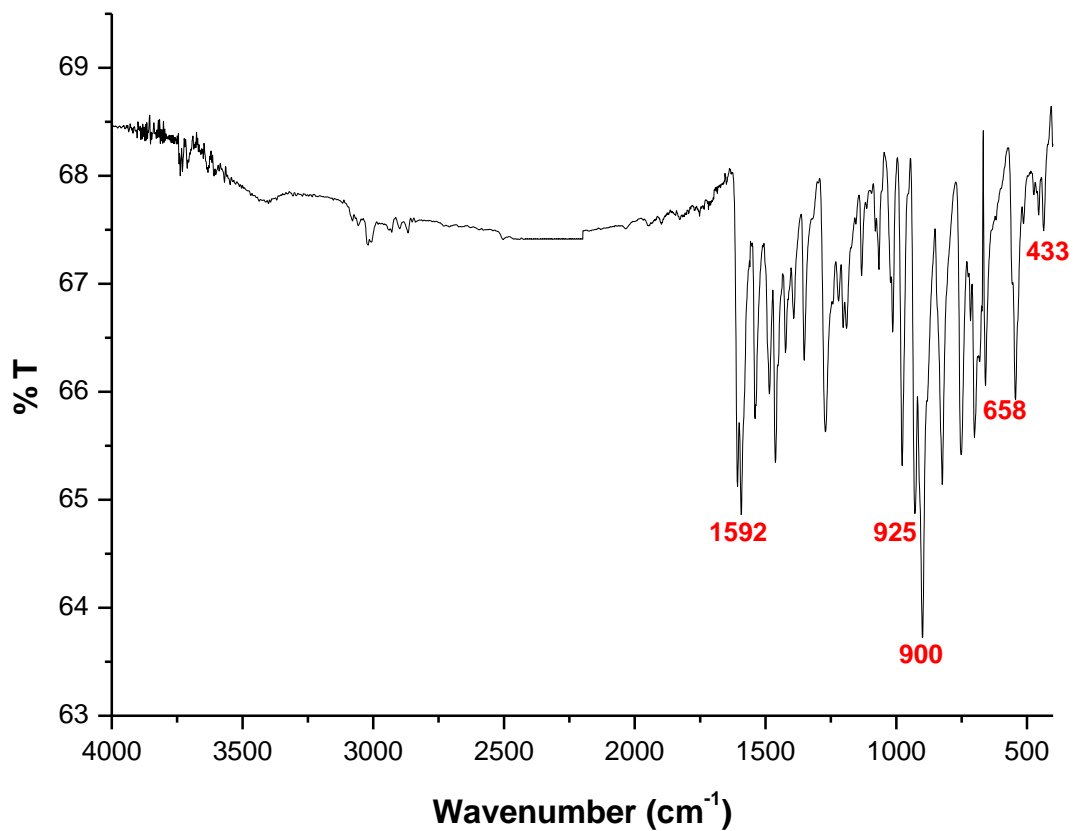

(b)

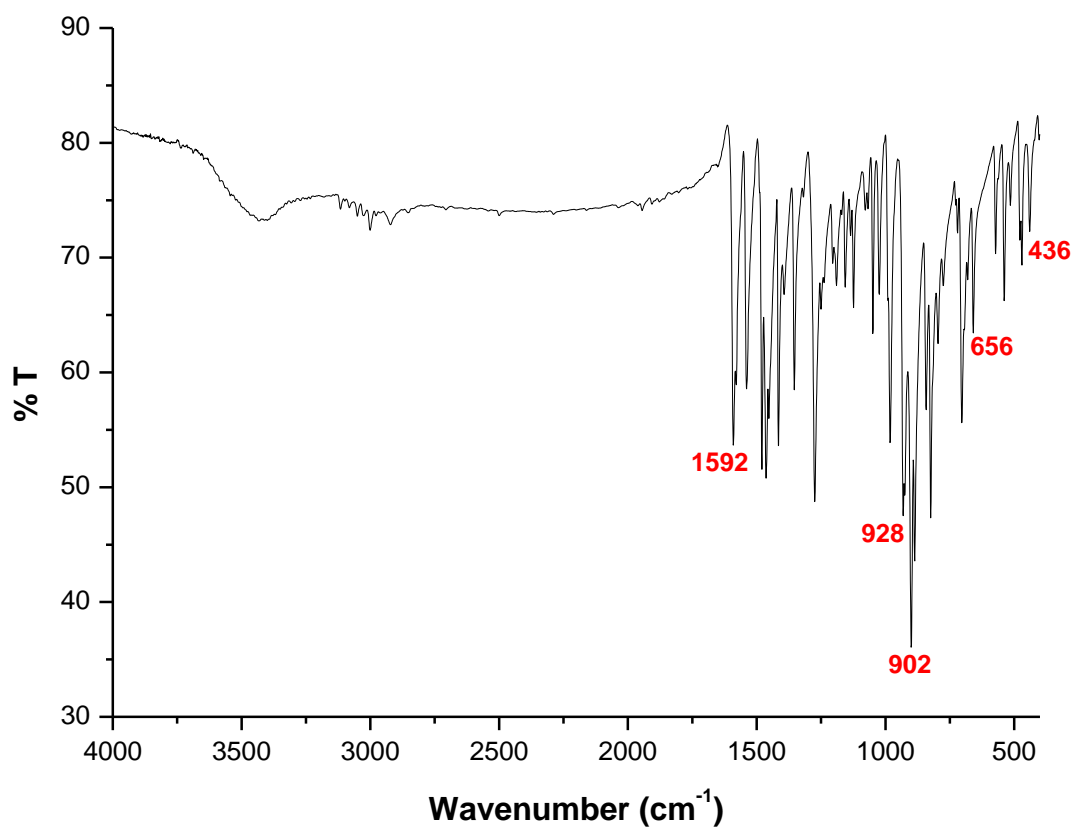

(c)

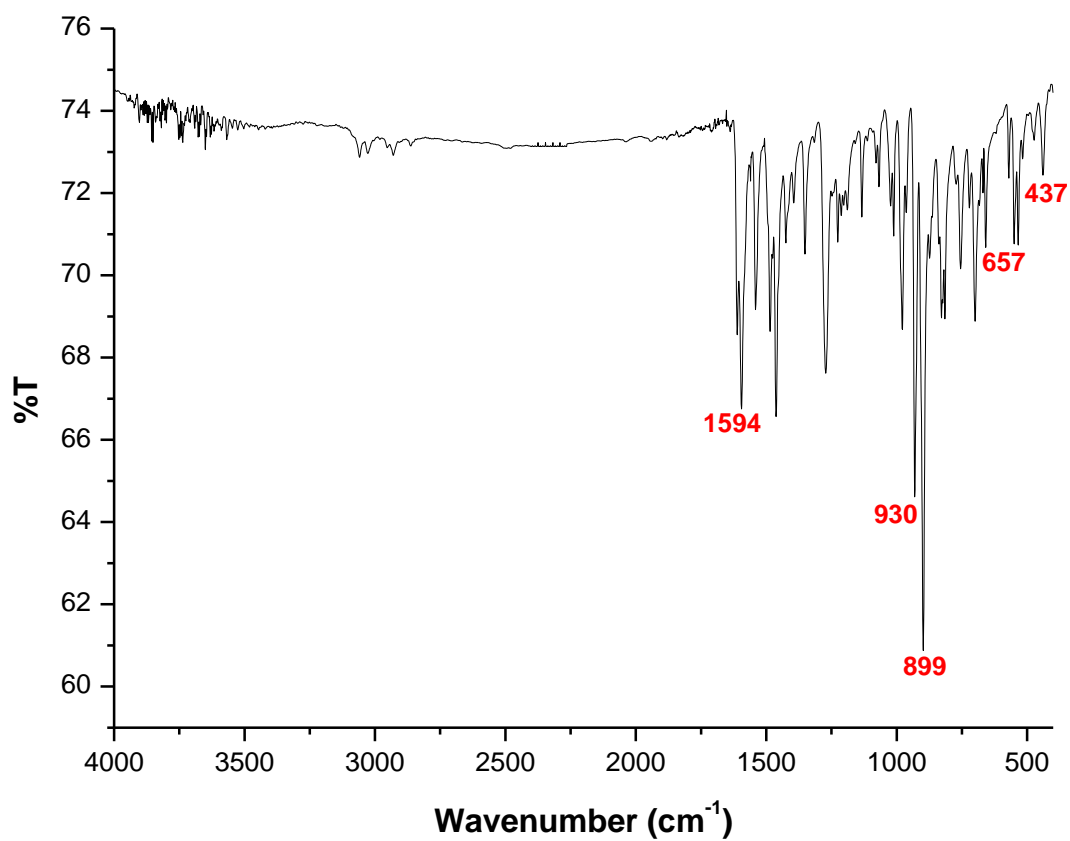

(d)

**Fig. S1:** IR spectra of (a) complex 1, (b) complex 2, (c) complex 3 and (d) complex 4 in KBr pellets.

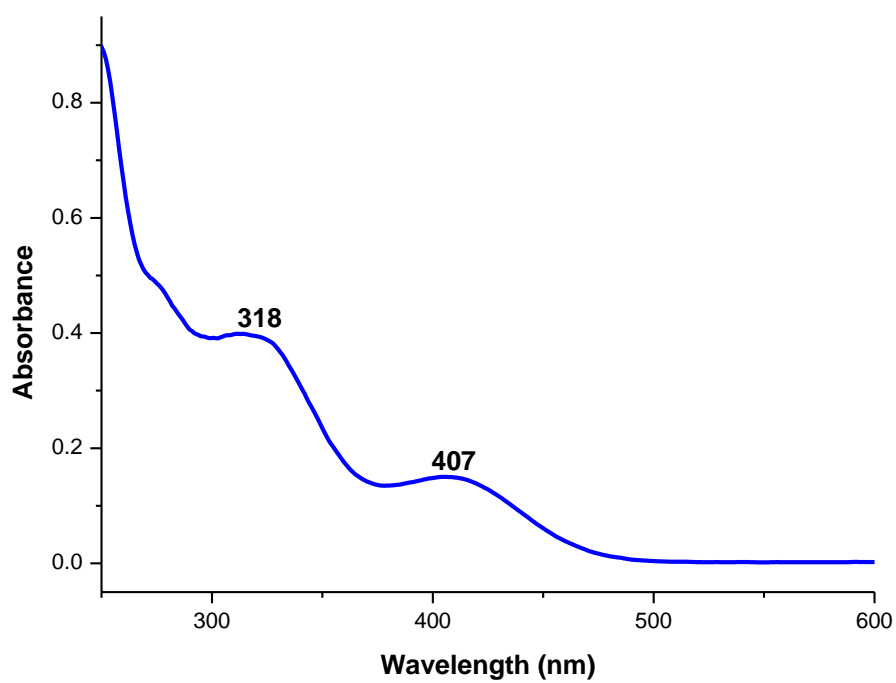

(a)

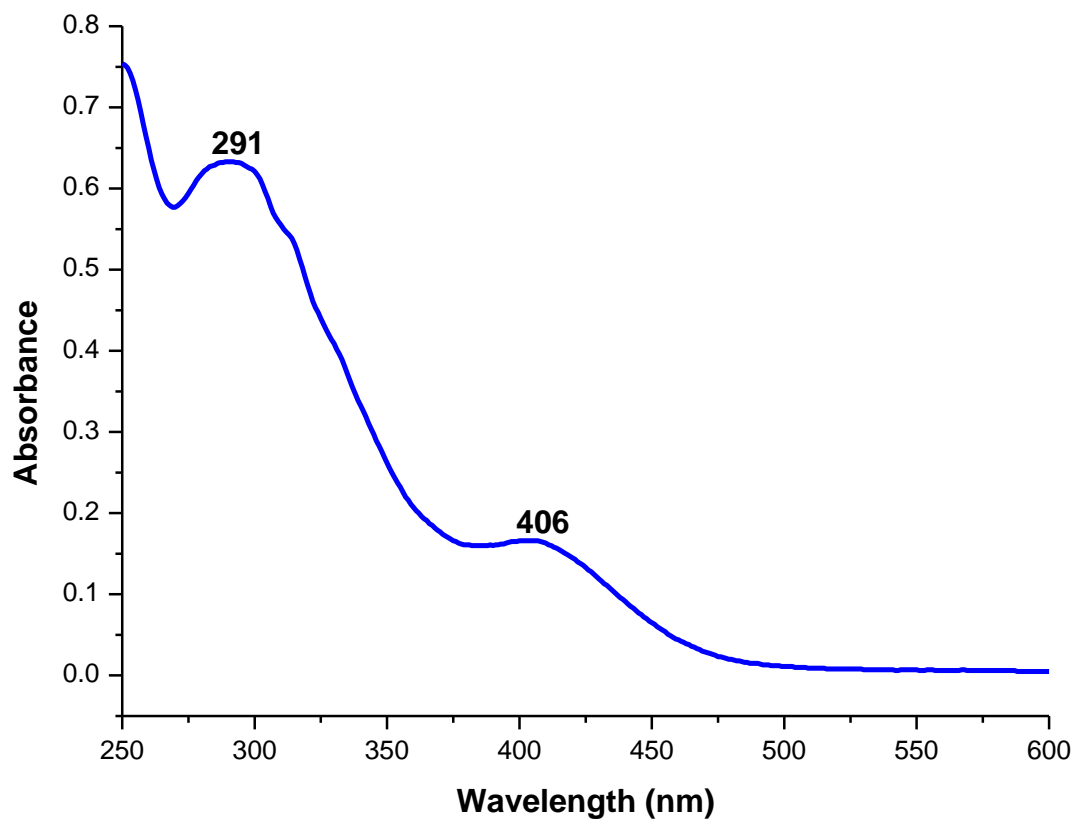

(b)

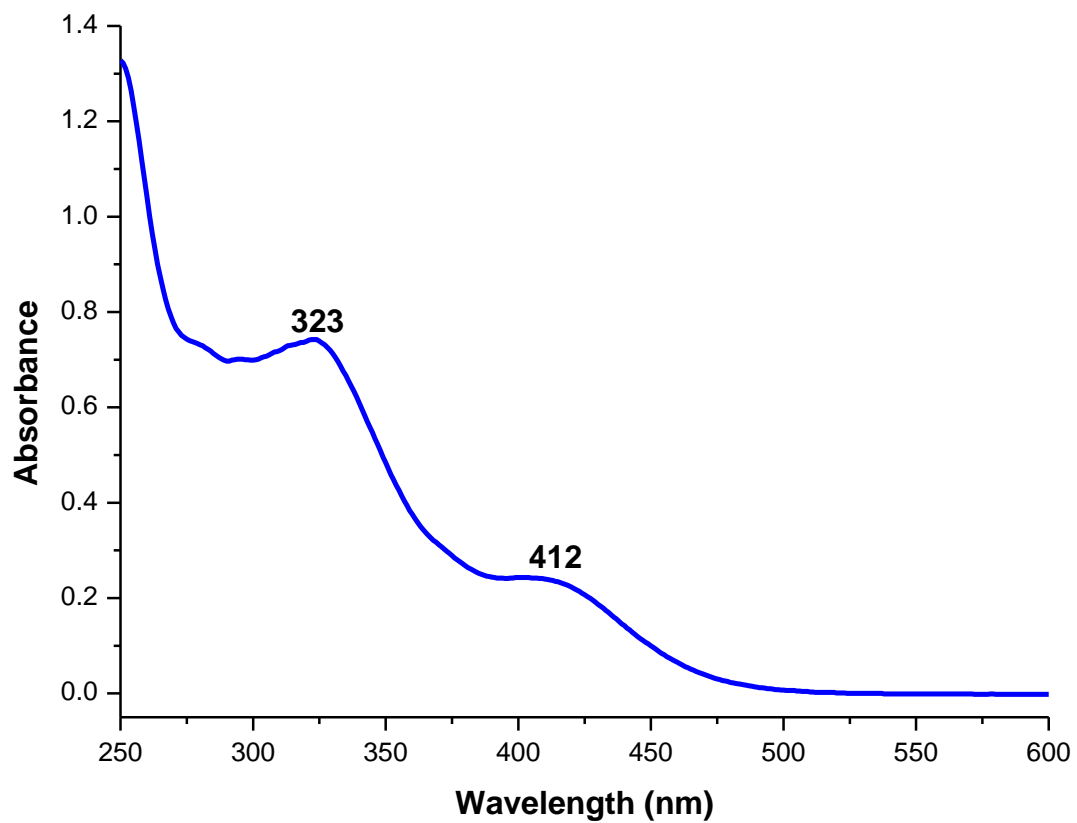

(c)

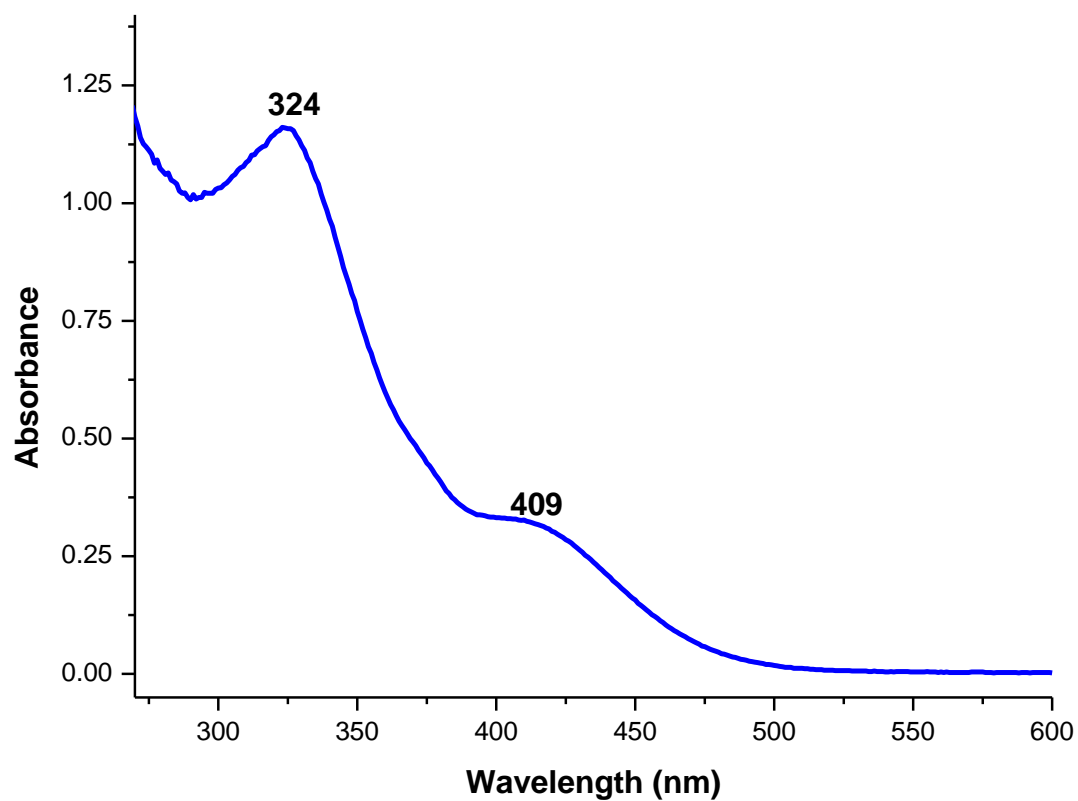

(d)

**Fig. S2:** UV-Vis spectra of (a) complex 1, (b) complex 2, (c) complex 3 and (d) complex 4 in  $\text{CH}_2\text{Cl}_2$  at 298 K.

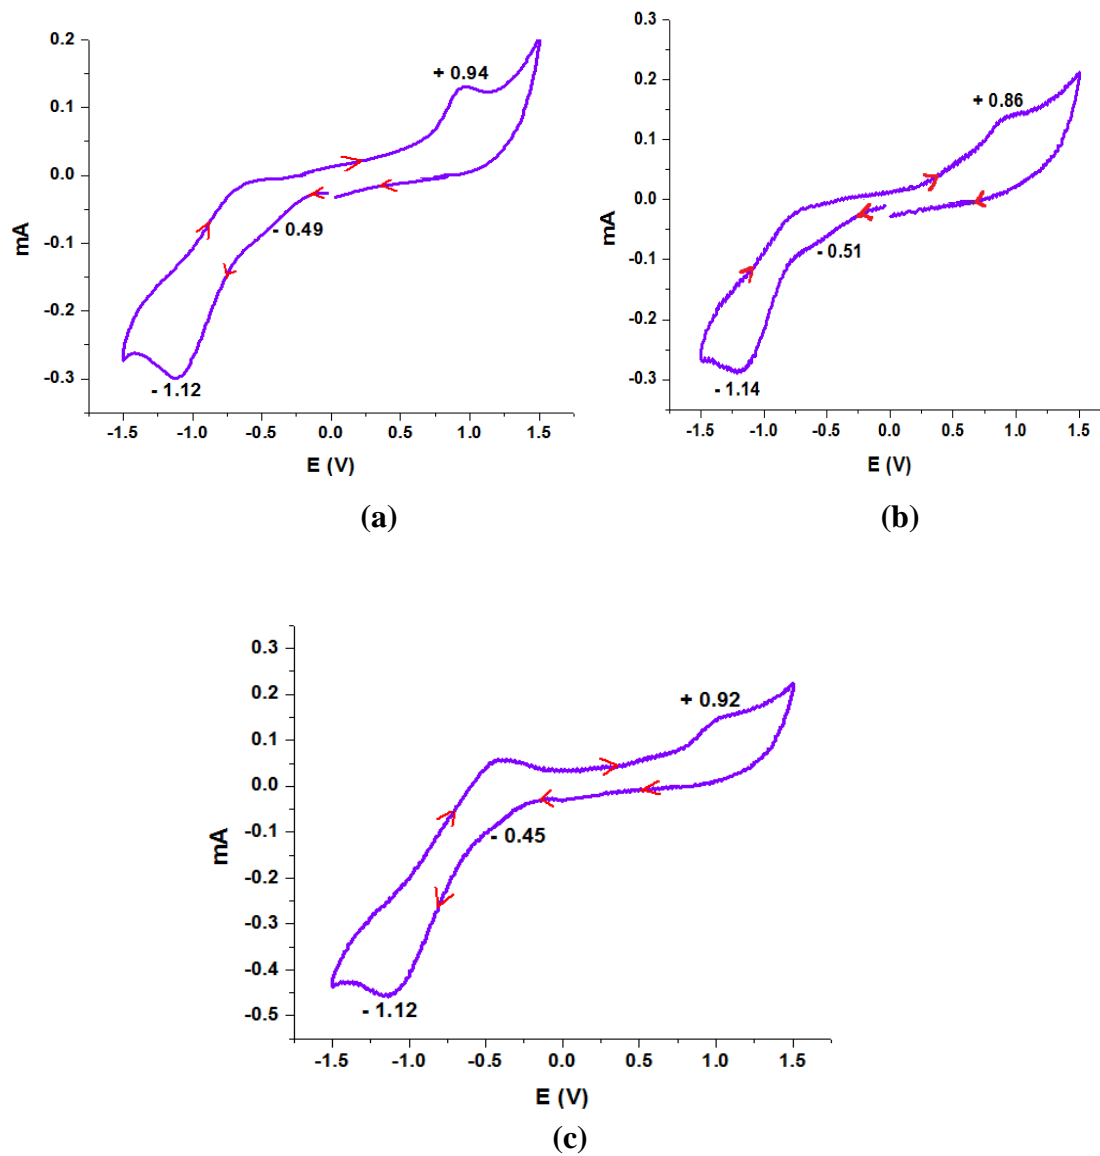

**Fig. S3:** Cyclic voltammograms of (a) complex 2, (b) complex 3 and (c) complex 4 in DMF at 298K.

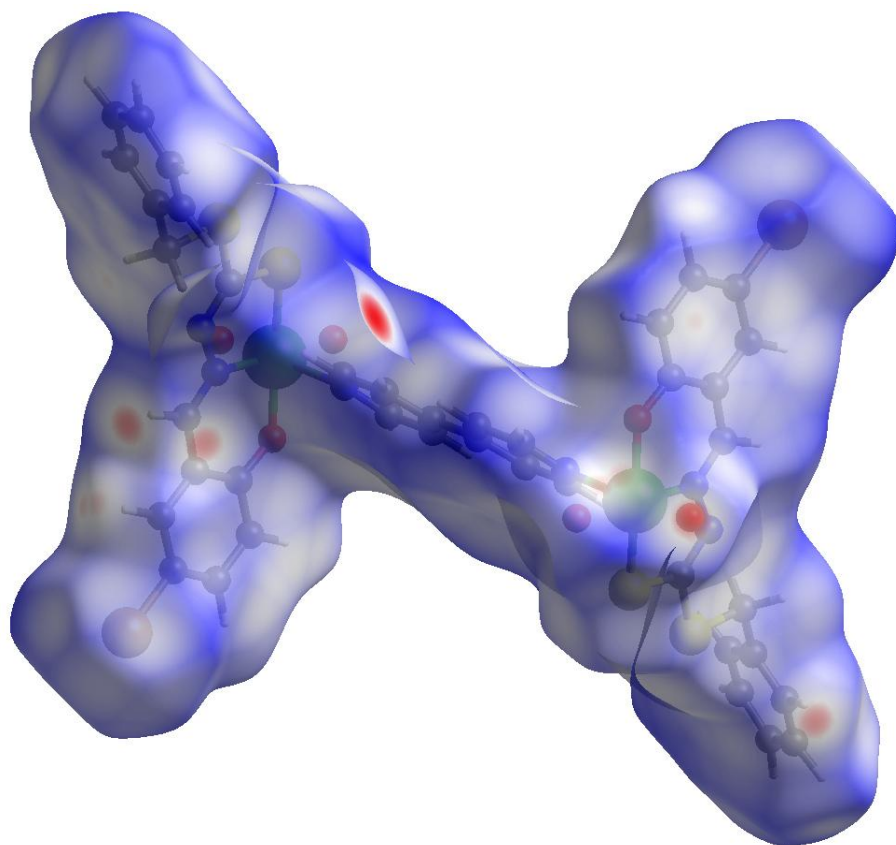

**(a)**

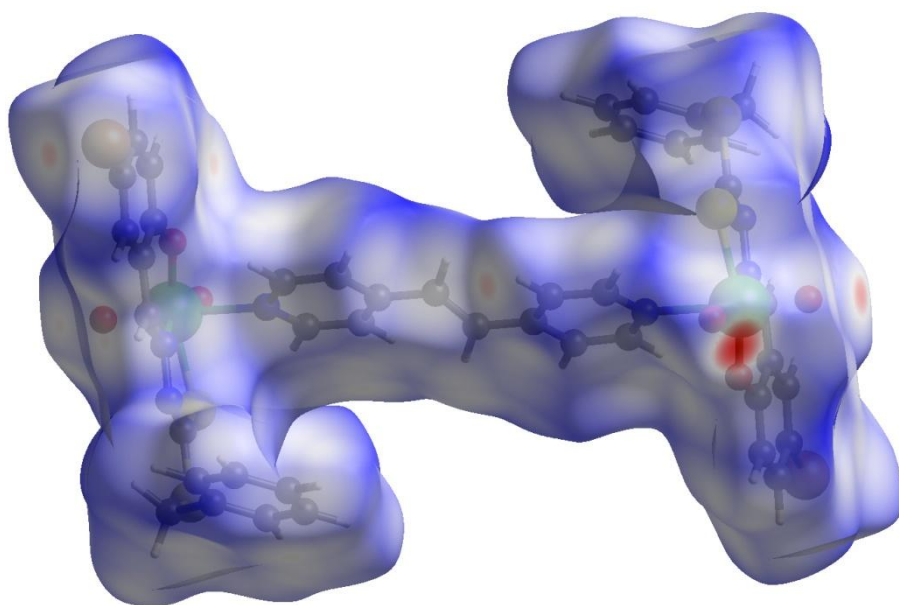

**(b)**



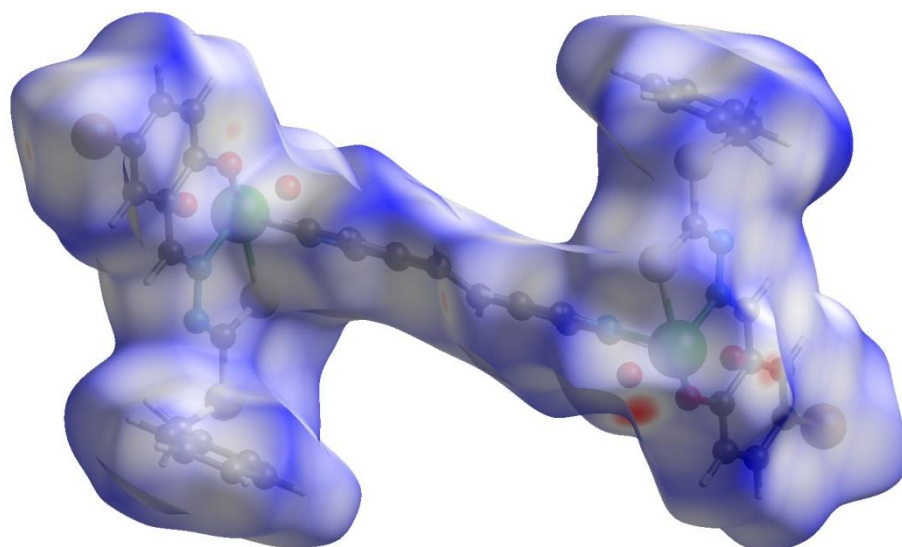

(c)

**Fig. S4:** Hirshfeld surface plot of (a) complex 1, (b) complex 2 and (c) complex 3 mapped with  $d_{\text{norm}}$ .

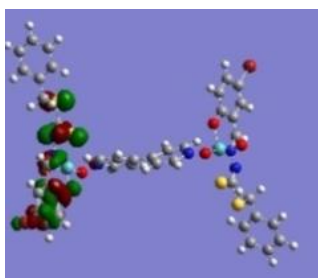

HOMO

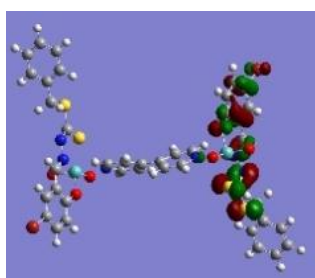

HOMO-1

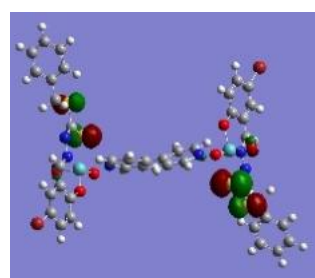

HOMO-2

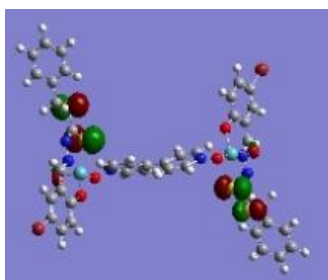

HOMO-3

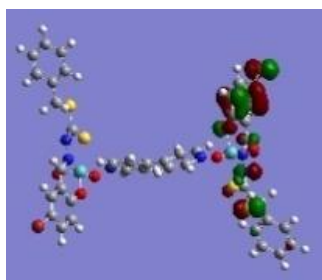

HOMO-4

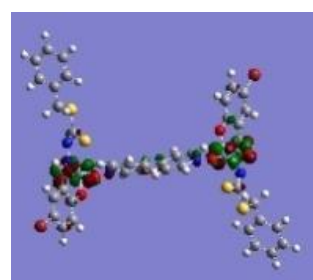

LUMO

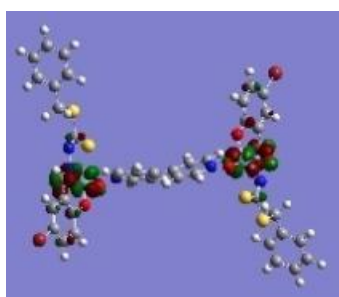

LUMO+1

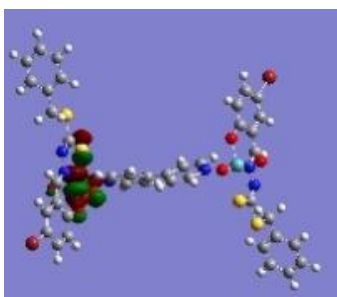

LUMO+2

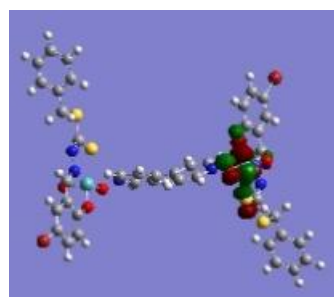

LUMO+3

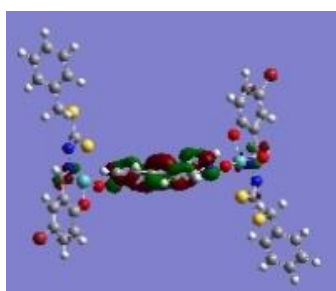

LUMO+4

(a)

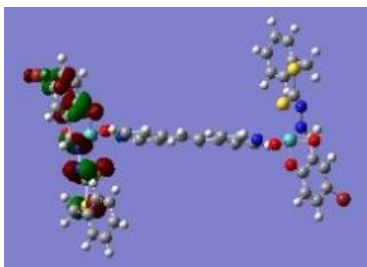

HOMO

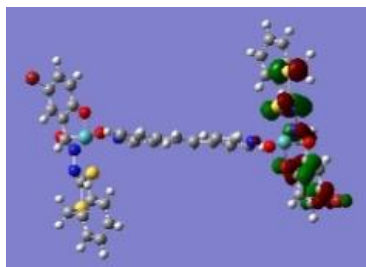

HOMO-1

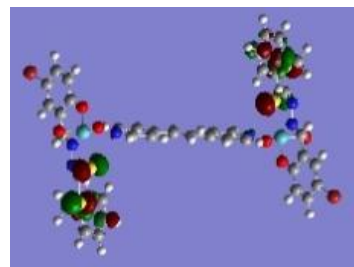

HOMO-2

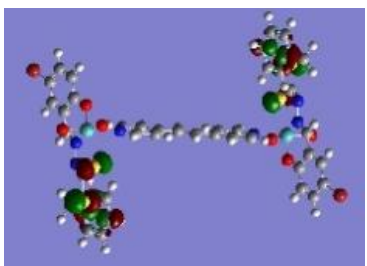

HOMO-3

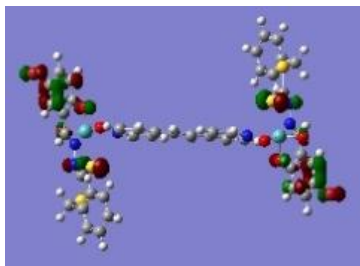

HOMO-4

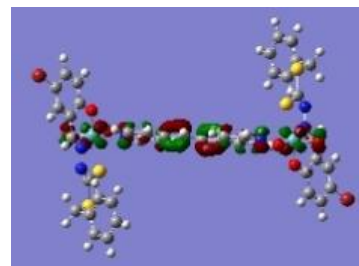

LUMO

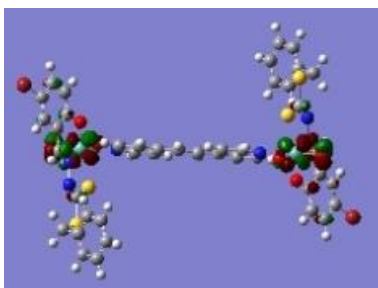

LUMO+1

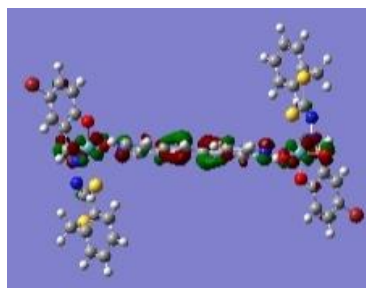

LUMO+2

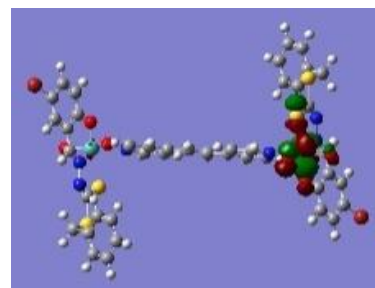

LUMO+3

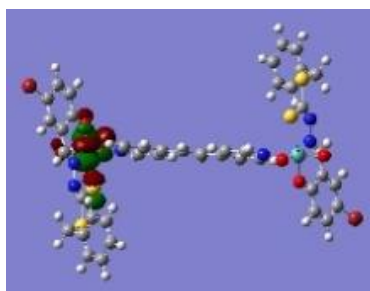

LUMO+4

(b)

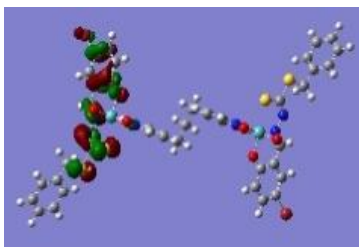

HOMO

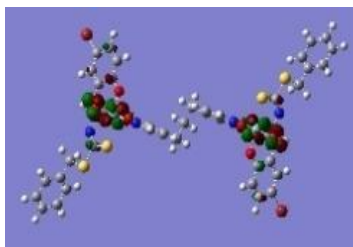

HOMO-1

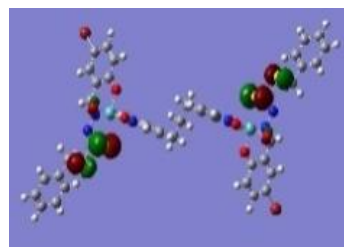

HOMO-2

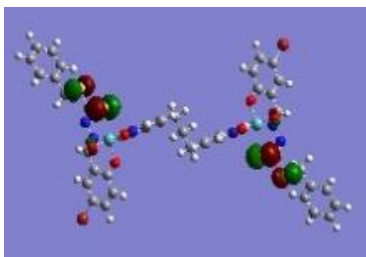

HOMO-3

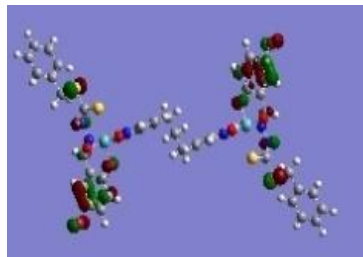

HOMO-4

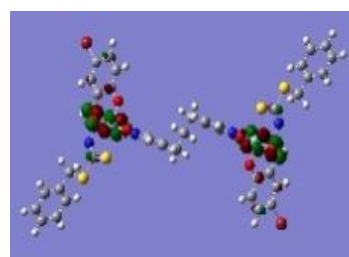

LUMO

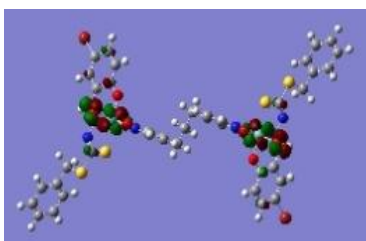

LUMO+1

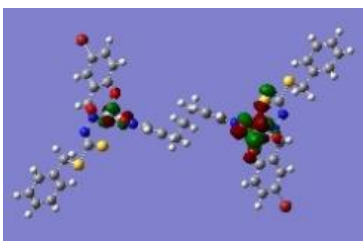

LUMO+2

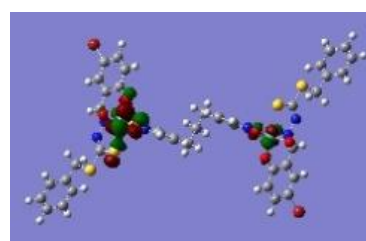

LUMO+3

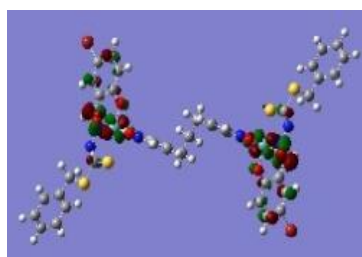

LUMO+4

(c)

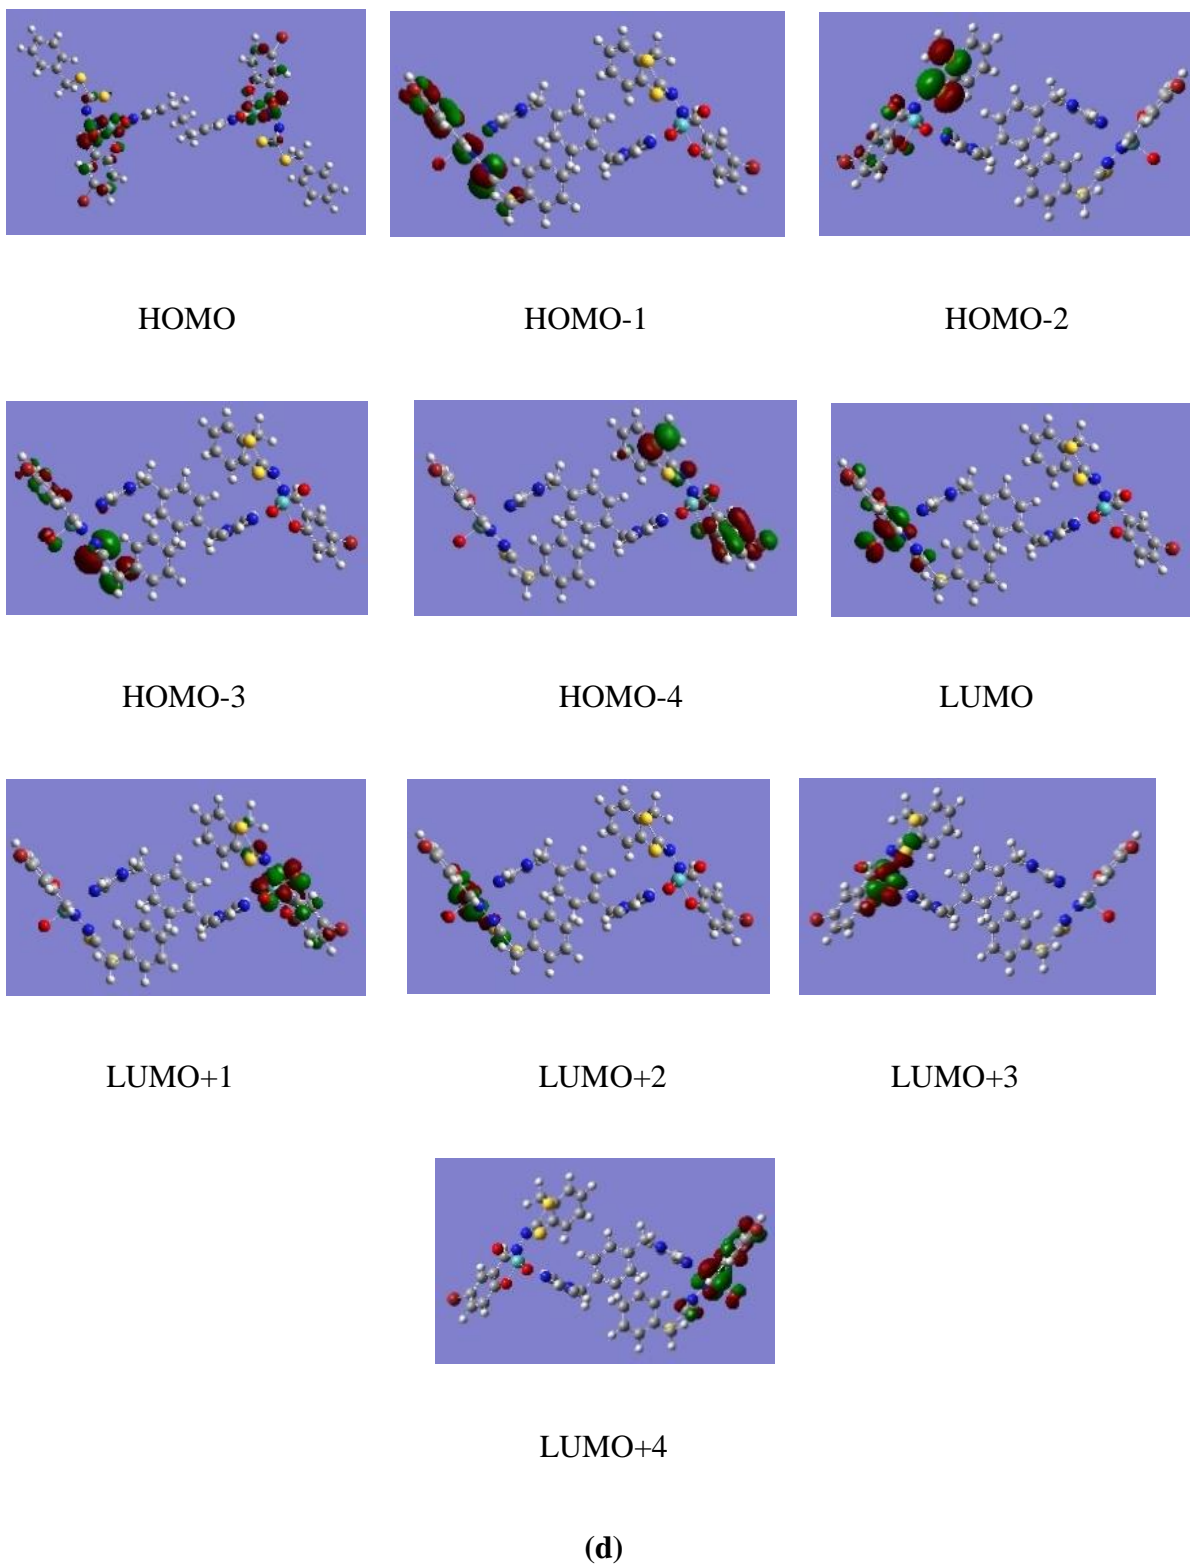

**Fig. S5:** Frontier orbitals of (a) complex 1, (b) complex 2, (c) complex 3 and (d) complex 4.

Filename: D:\lab 1\NRP-31.dtd  
Operator ID: ITO  
Sample ID: NRP-3  
Sample Weight: 1.367 mg  
Comment:

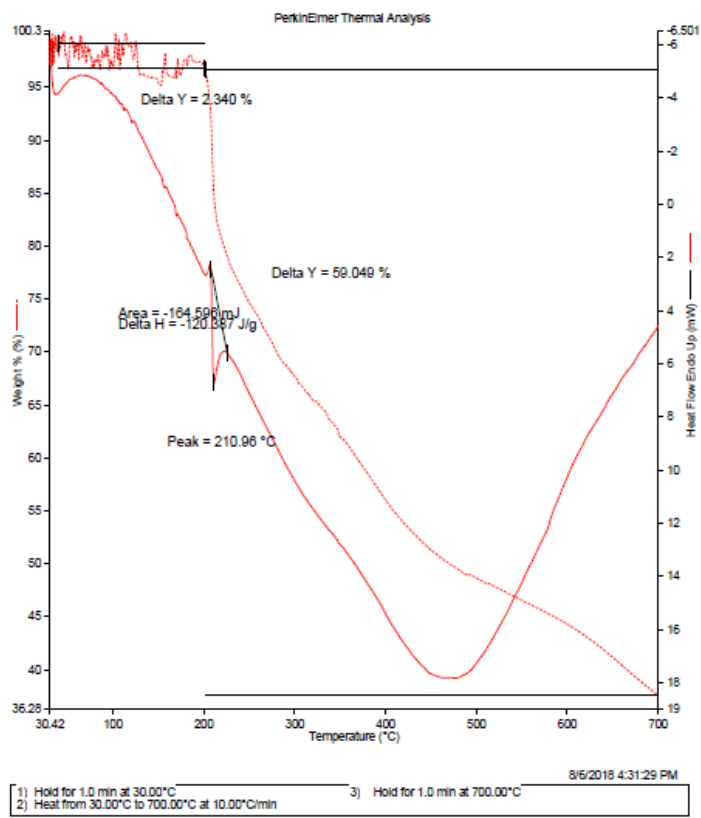

(a)

Filename: D:\lab\TNRP-4.tdd  
Operator ID: IITO  
Sample ID: NRP-4  
Sample Weight: 1.966 mg  
Comment:

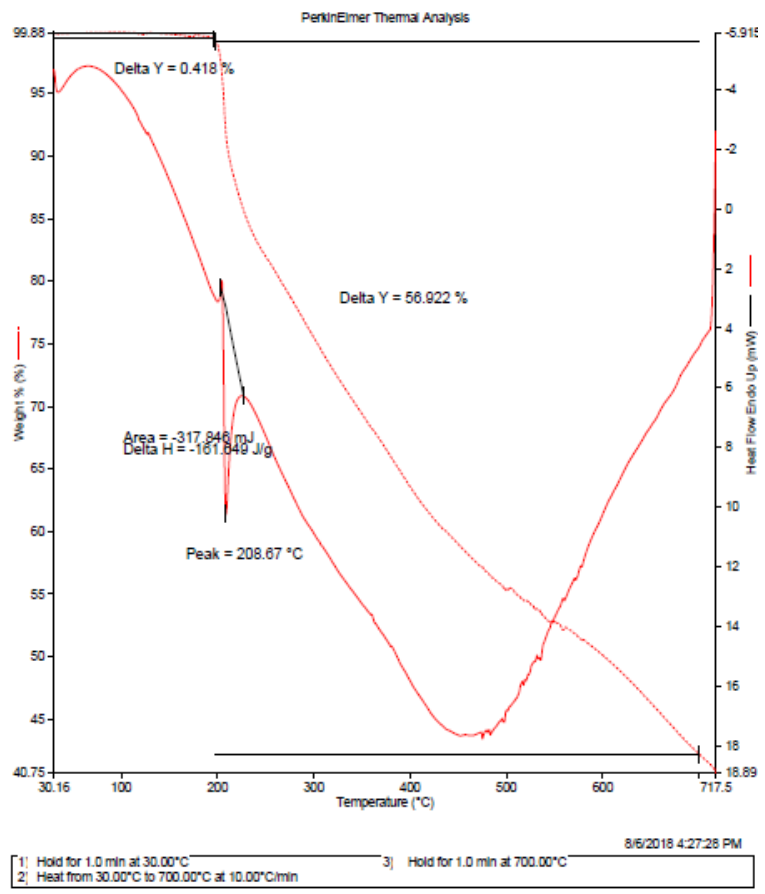

(b)

Filename: D:\lab\1\NRP-5\tdid  
Operator ID: IITD  
Sample ID: NRP-5  
Sample Weight: 4.223 mg  
Comment:

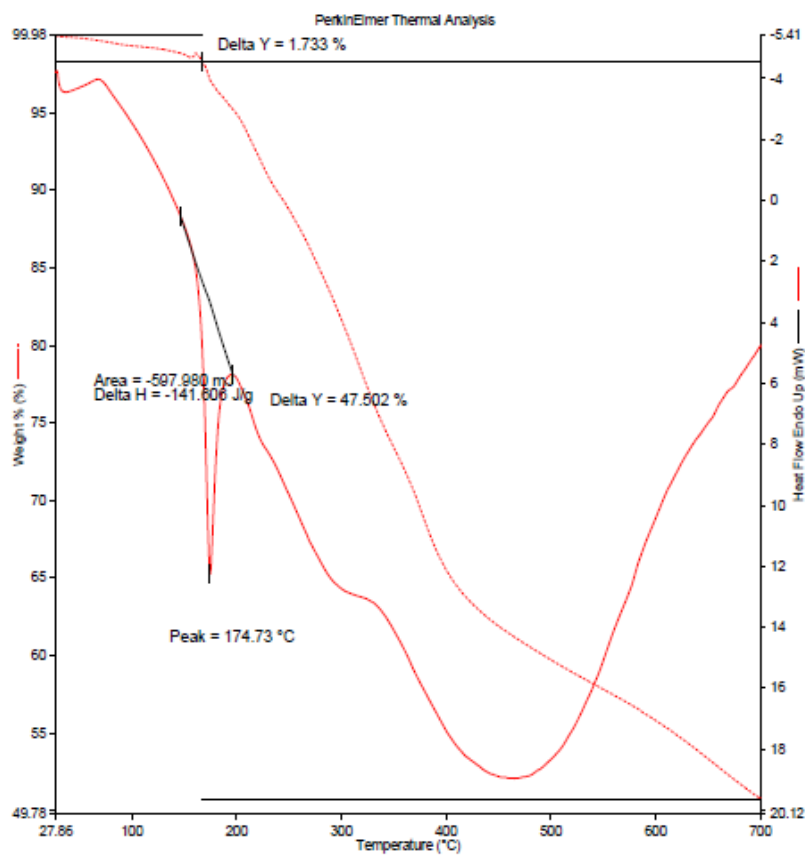

8/7/2018 2:22:02 PM

1) Hold for 1.0 min at 30.00°C  
2) Heat from 30.00°C to 700.00°C at 10.00°C/min  
3) Hold for 1.0 min at 700.00°C

(c)



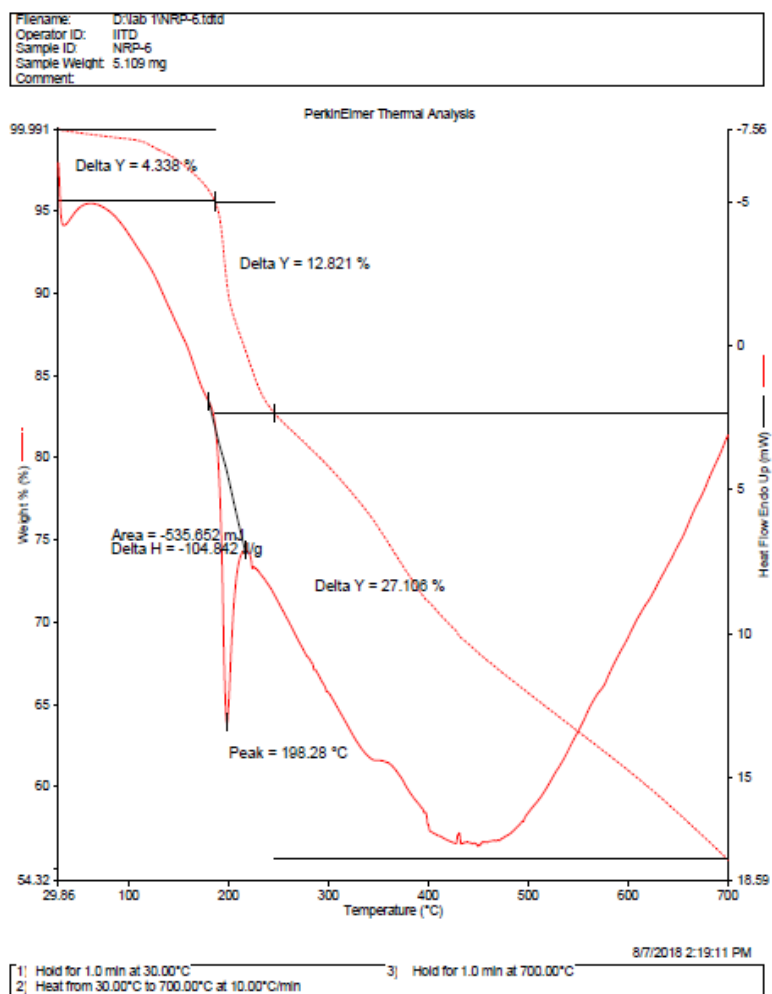

(d)

**Fig. S6:** TG-DTA curves for (a) complex 1, (b) complex 2, (c) complex 3 and (d) complex 4.

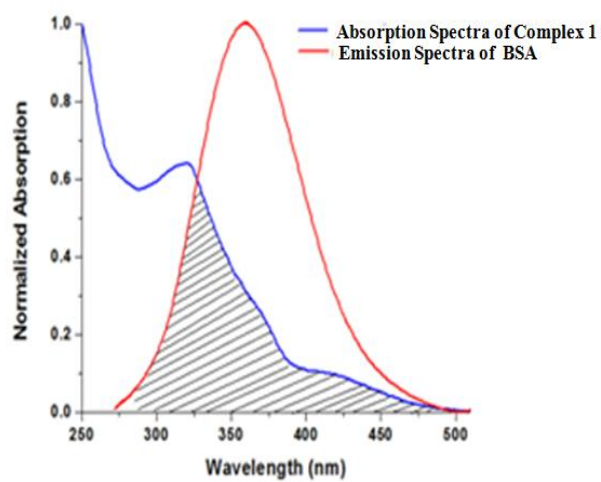

(a)

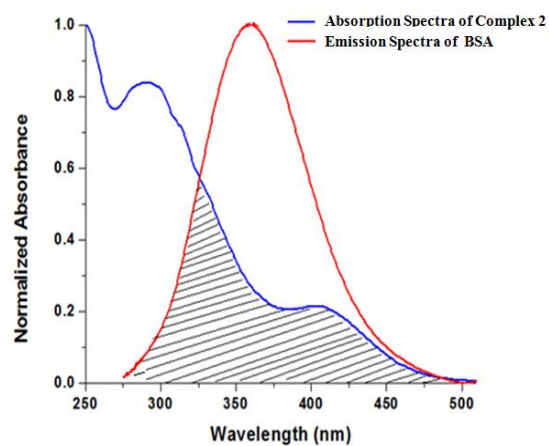

(b)

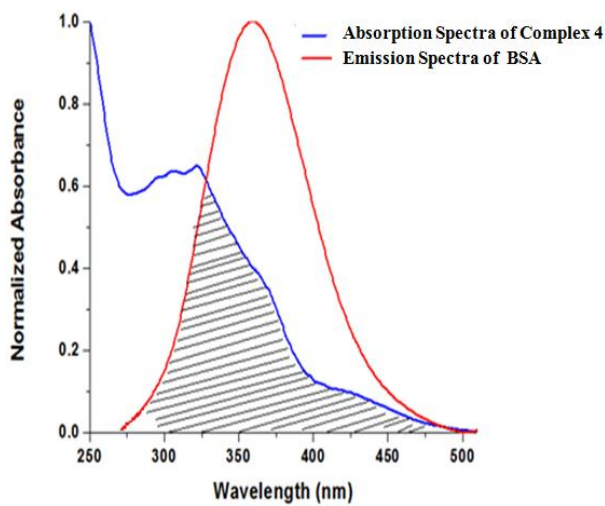

(c)

**Fig. S7:** Overlap of emission spectra of BSA and absorption spectra of (a) complex 1, (b) complex 2 and (c) complex 4.

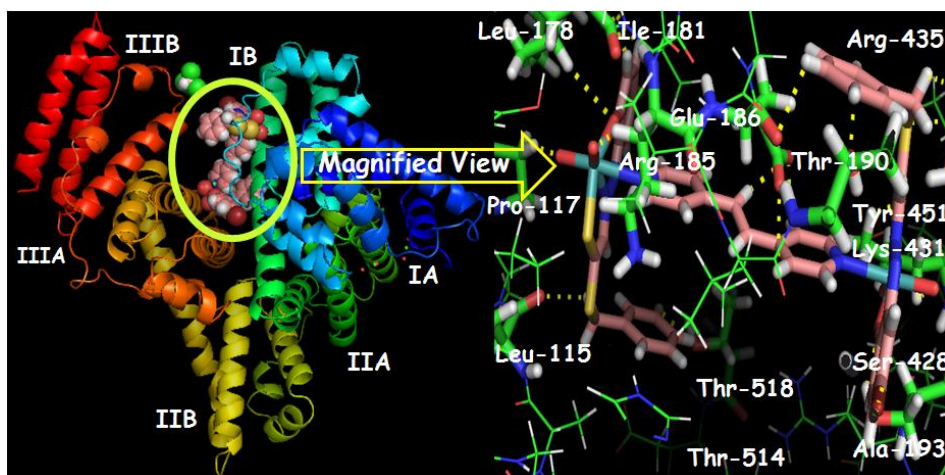

(a)

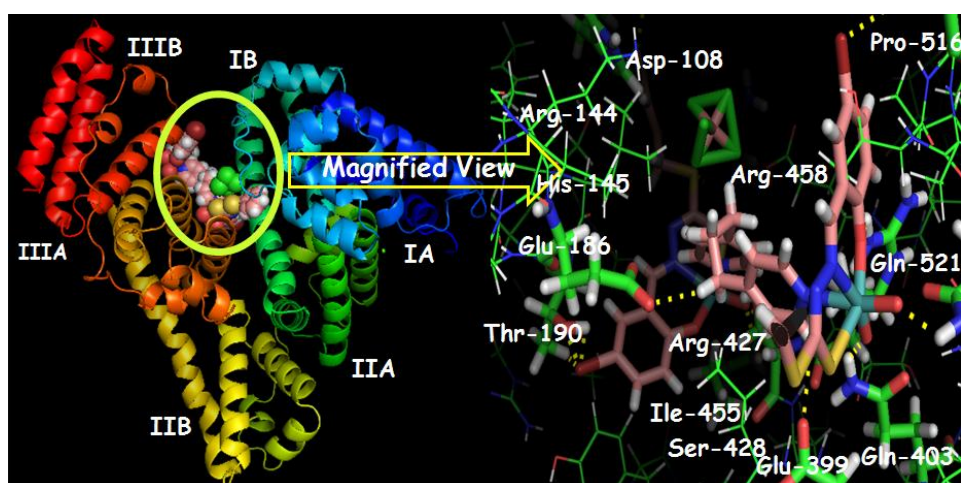

(b)

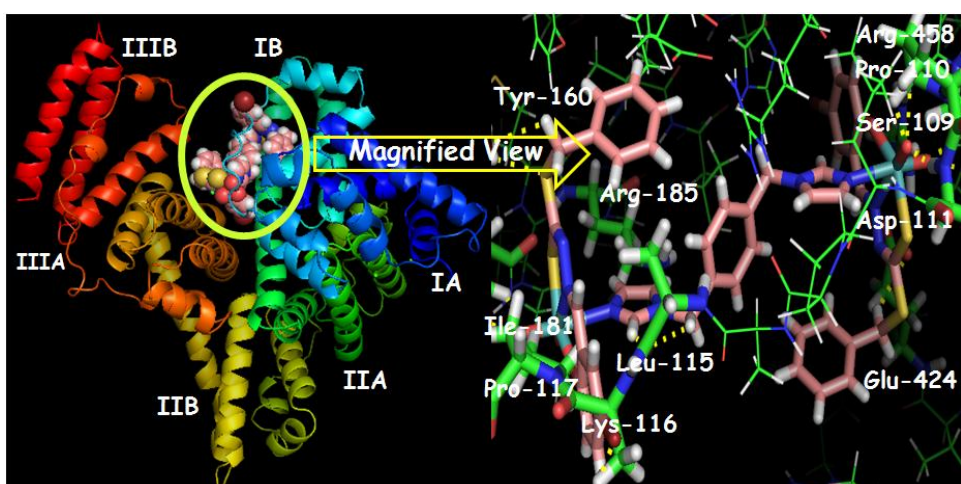

(c)

**Fig. S8:** Molecular docking images of (a) complex 2 (b) complex 3 and (c) complex 4 with BSA, residues surrounding the binding sites is highlighted.

**Table S1: Fingerprint plots of complex 1**

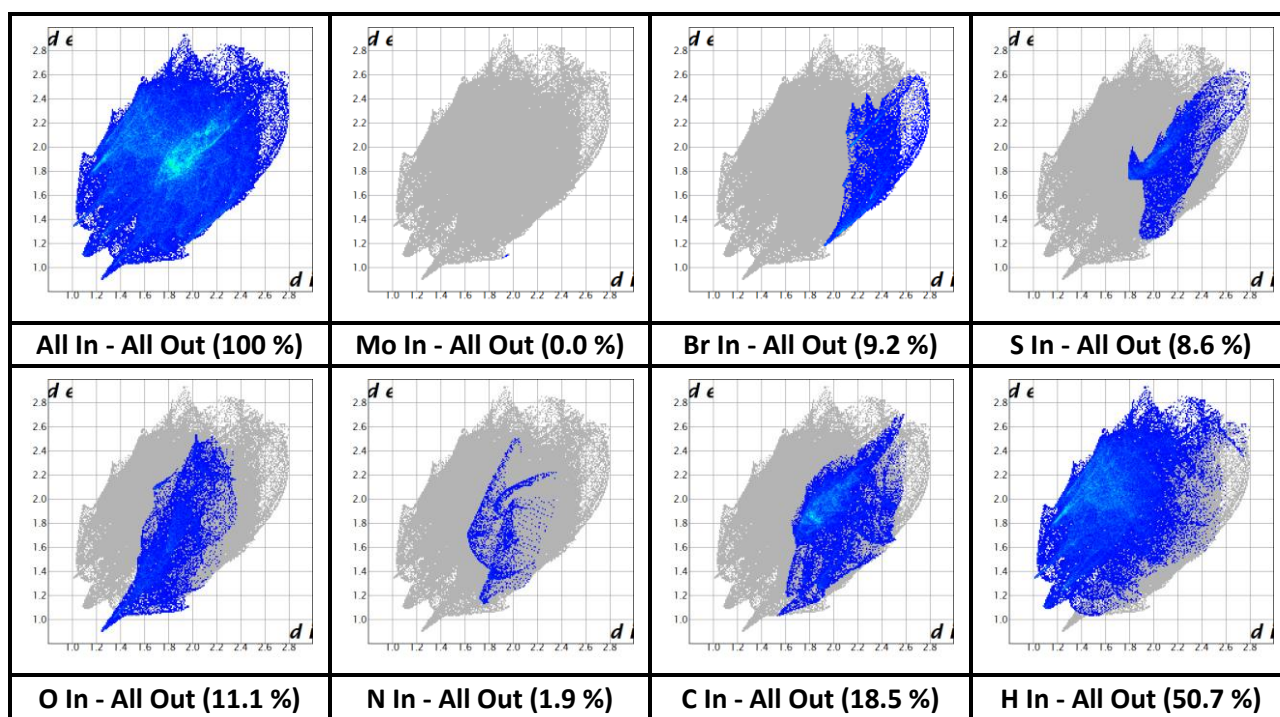

**Table S2: Fingerprint plots of complex 2**

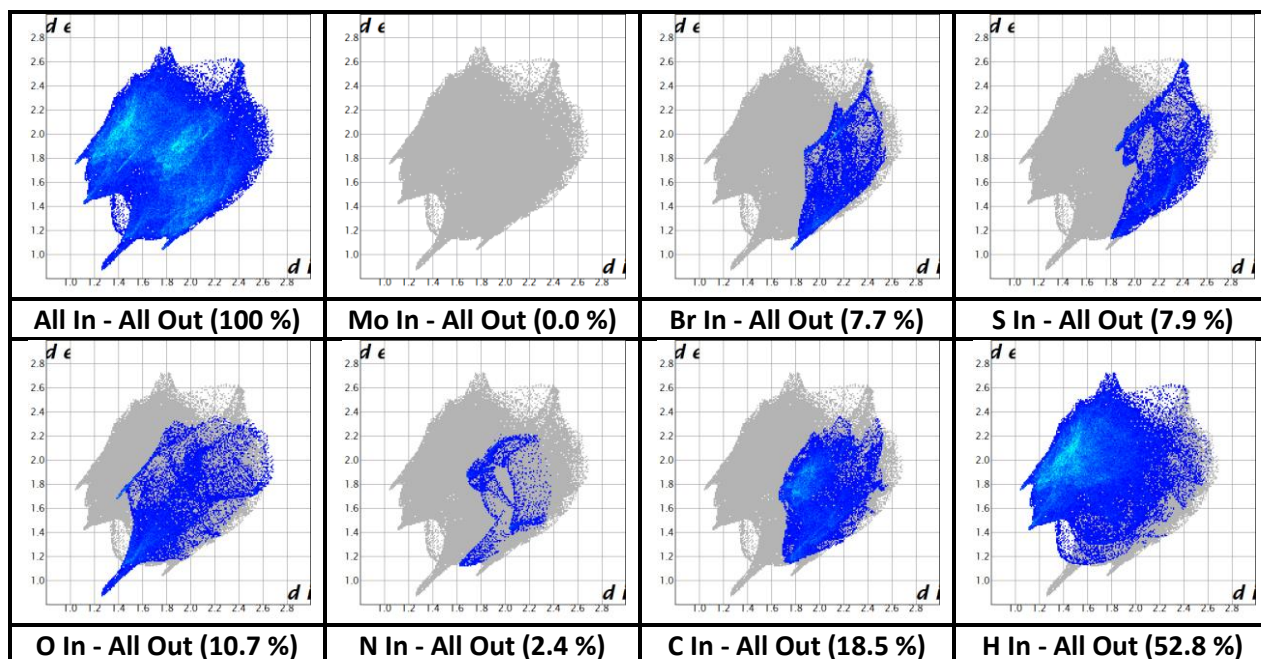



**Table S3: Fingerprint plots of complex 3**

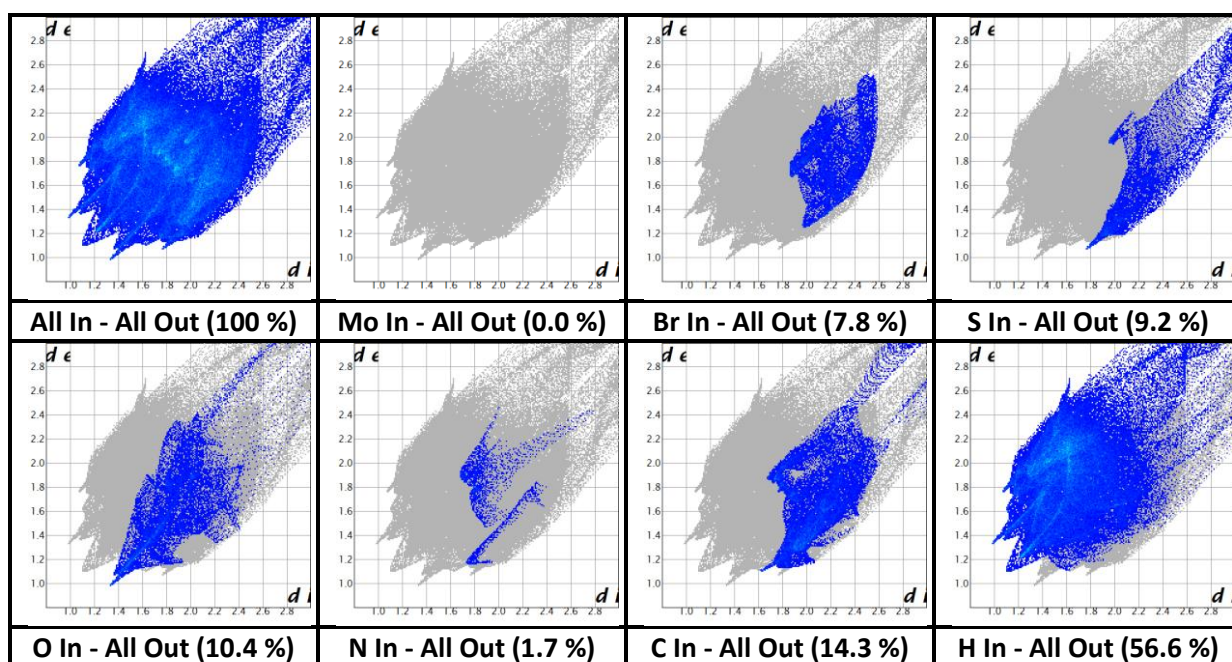

**Table S4: Fingerprint plots of complex 4**

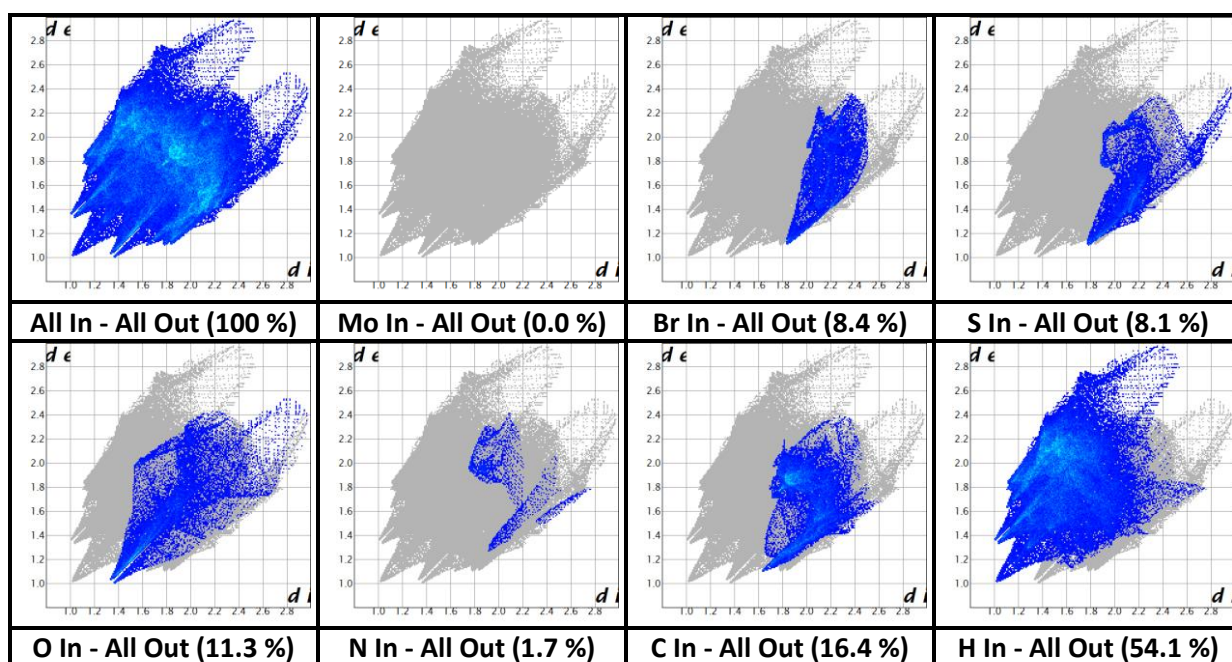

**Table S5:** Hirshfeld surface volume and surface area of complexes **1-4**

| Complex  | Surface Volume ( $\text{\AA}^3$ ) | Surface Area ( $\text{\AA}^2$ ) |
|----------|-----------------------------------|---------------------------------|
| <b>1</b> | 1068.89                           | 892.34                          |
| <b>2</b> | 1078.04                           | 909.29                          |
| <b>3</b> | 1252.64                           | 974.82                          |
| <b>4</b> | 1169.43                           | 896.26                          |

**Table S6:** Förster Resonance Energy Transfer (FRET) parameters for the ligand and the complexes **1-4** with BSA

| Compound              | $J$ ( $\text{M}^{-1} \text{cm}^3$ ) | $R_0$ (nm) | $r$ (nm) | $E$  |
|-----------------------|-------------------------------------|------------|----------|------|
| <b>H<sub>2</sub>L</b> | $2.09 \times 10^{-14}$              | 2.87       | 2.90     | 0.68 |
| <b>1</b>              | $1.77 \times 10^{-14}$              | 2.80       | 2.93     | 0.63 |
| <b>2</b>              | $3.41 \times 10^{-14}$              | 2.13       | 2.25     | 0.59 |
| <b>3</b>              | $3.25 \times 10^{-14}$              | 3.10       | 3.40     | 0.53 |
| <b>4</b>              | $2.55 \times 10^{-14}$              | 2.98       | 3.31     | 0.54 |

**Table S7:** Results of molecular docking: Adjacent residues and hydrogen bonding interactions

| Complex                | Hydrogen bonding interactions                                                                                                                                                                                                                                                                                                                                                                                                                                          | Adjacent amino acids                                                                                       |
|------------------------|------------------------------------------------------------------------------------------------------------------------------------------------------------------------------------------------------------------------------------------------------------------------------------------------------------------------------------------------------------------------------------------------------------------------------------------------------------------------|------------------------------------------------------------------------------------------------------------|
| BSA...Complex <b>1</b> | (Leu-115)-C-H...O-Mo = 2.5 $\text{\AA}$<br>(Arg-185)-N-H...O-Mo = 1.7 $\text{\AA}$<br>(Thr-518)-O-H...Br = 1.7 $\text{\AA}$<br>(Arg-458)-N-H...O-Mo = 1.8 $\text{\AA}$<br>(Arg-458)-C-H...O-Mo = 1.0 $\text{\AA}$<br>(Asp-108)-O...H-C = 2.2 $\text{\AA}$<br>(Tyr-147)-N-H...Br = 1.8 $\text{\AA}$<br>(His-145)-C-H...Br = 2.2 $\text{\AA}$<br>(Arg-458)-N-H...O-Mo = 2.5 $\text{\AA}$<br>(Ser-192)-O...H-C = 2.3 $\text{\AA}$<br>(Arg-144)-N-H...S = 1.9 $\text{\AA}$ | Leu-112, Leu-115, Tyr-147,<br>Lys-114, Arg-144, Arg-185,<br>Arg-458, Ser-192, His-145,<br>Thr-518, Asp-108 |

|                 |                                                                                                                                                                                                                                                                                                                                                                                                                                                                                                                                                                                                                                                                                                                                                                                                             |                                                                                                                                                |
|-----------------|-------------------------------------------------------------------------------------------------------------------------------------------------------------------------------------------------------------------------------------------------------------------------------------------------------------------------------------------------------------------------------------------------------------------------------------------------------------------------------------------------------------------------------------------------------------------------------------------------------------------------------------------------------------------------------------------------------------------------------------------------------------------------------------------------------------|------------------------------------------------------------------------------------------------------------------------------------------------|
|                 | <p>(Arg-144)-N-H...Cl-(solvent)= 2.7 Å<br/> (Leu-112)-N-H...Cl-(solvent)= 0.9 Å<br/> (Lys-114)-N...H-C-CH<sub>2</sub>-S = 0.8 Å<br/> (Lys-114)-C-H...N-N = 0.8 Å<br/> (Arg-185)-N-H...O-Mo = 2.8 Å</p>                                                                                                                                                                                                                                                                                                                                                                                                                                                                                                                                                                                                      |                                                                                                                                                |
| BSA...Complex 2 | <p>(Pro-117)-C-H...O-Mo = 1.7 Å<br/> (Arg-185)-C-H...O-Mo = 2.1 Å<br/> (Thr-518)-O...H-C = 2.4 Å<br/> (Ser-428)-O...H-C = 1.8 Å<br/> (Thr-514)-O...H-C-(solvent) = 2.9 Å<br/> (Thr-514)-C-H...Cl-(solvent)= 2.1 Å<br/> (Glu-186)-O...H-C-(bpe) = 2.2 Å<br/> (Glu-186)-O...H-C-(bpe) = 2.2 Å<br/> (Glu-186)-O...H-C-(bpe) = 3.0 Å<br/> (Lys-431)-C-H...O-Mo = 2.5 Å<br/> (Lys-431)-C-H...O-Mo = 2.0 Å<br/> (Ala-193)-C-H...Br = 1.1 Å<br/> (Ala-193)-C-H...Br = 2.3 Å<br/> (Ile-181)-C-H...O-Mo = 2.9 Å<br/> (Ser-428)-O-H...O-Mo = 2.2 Å<br/> (Leu-178)-O...H-C = 2.3 Å<br/> (Leu-178)-O...H-C = 2.9 Å<br/> (Tyr-451)-O...H-C-S = 2.4 Å<br/> (Arg-435)-C-H...S = 2.4 Å<br/> (Lys-431)-C-H...S-Mo = 1.6 Å<br/> (Leu-115)-O...H-C-S = 2.8 Å<br/> (Glu-186)-O...H-C = 2.5 Å<br/> (Thr-190)-O...H-C = 1.9 Å</p> | <p>Ala-193, Leu-115, Leu-178,<br/> Ile-181, Tyr-451, Glu-186,<br/> Arg-185, Arg-435, Pro-117,<br/> Thr-190, Thr-518, Lys-431,<br/> Ser-428</p> |
| BSA...Complex 3 | <p>(Glu-186)-O...H-C-(tmp) = 2.7 Å<br/> (Gln-403)-N-H...O-Mo = 2.8 Å<br/> (Gln-521)-N-H...O-Mo = 2.0 Å</p>                                                                                                                                                                                                                                                                                                                                                                                                                                                                                                                                                                                                                                                                                                  | <p>Glu-186, Glu-399, Gln-430,<br/> Gln-521, Arg-144, Arg-427,<br/> Arg-458, Pro-516, Thr-190,</p>                                              |

|                        |                                                                                                                                                                                                                                                                                                                                                                                                                                                                                                                                                                  |                                                                                                                         |
|------------------------|------------------------------------------------------------------------------------------------------------------------------------------------------------------------------------------------------------------------------------------------------------------------------------------------------------------------------------------------------------------------------------------------------------------------------------------------------------------------------------------------------------------------------------------------------------------|-------------------------------------------------------------------------------------------------------------------------|
|                        | <p>(Arg-427)-N-H...O-Mo = 2.9 Å<br/> (Arg-427)-N-H...O-Mo = 1.9 Å<br/> (Pro-156)-C-H...Br = 3.1 Å<br/> (Glu-399)-O...H-C-(tmp) = 2.8 Å<br/> (Thr-190)-O-H...Br = 1.6 Å<br/> (Thr-190)-C-H...Br = 2.0 Å<br/> (Arg-144)-O...H-C = 2.5 Å<br/> (His-145)-N...H-C = 2.4 Å<br/> (Asp-108)-O...H-C = 2.9 Å<br/> (Arg-458)-C-H...S = 1.9 Å<br/> (Ile-455)-C-H...O-Mo = 2.7 Å<br/> (Ser-428)-C-H...O-Mo = 1.6 Å<br/> (Ile-455)-C-H...O-Mo = 1.8 Å<br/> (Ser-428)-O...H-C-(tmp) = 1.0 Å<br/> (Thr-190)-O...Br-C = 1.8 Å</p>                                                | <p>His-145, Asp-108, Ser-428,<br/> Ile-455</p>                                                                          |
| <p>BSA...Complex 4</p> | <p>(Ser-109)-C-H...O-Mo = 1.9 Å<br/> (Arg-458)-N-H...O-Mo = 1.9 Å<br/> (Asp-111)-N-H...O-Mo = 2.1 Å<br/> (Pro-110)-C-H...O-Mo = 2.7 Å<br/> (Glu-424)-O...H-C=O = 2.9 Å<br/> (Pro-110)-C-H...O-Mo = 1.6 Å<br/> (Leu-115)-O...H-C-(bix) = 2.2 Å<br/> (Leu-115)-O...H-C-(bix) = 2.8 Å<br/> (Lys-116)-C-H...Br = 1.5 Å<br/> (Lys-116)-C-H...Br = 0.9 Å<br/> (Arg-185)-N...H-C-(bix) = 0.7 Å<br/> (Ile-181)-C-H...O-Mo = 1.8 Å<br/> (Pro-117)-C-H...O-Mo = 1.2 Å<br/> (Tyr-160)-C-H...S = 2.3 Å<br/> (Tyr-160)-O...H-C-S = 2.6 Å<br/> (Glu-424)-O...H-C-S = 2.8 Å</p> | <p>Leu-115, Ile-181, Tyr-160,<br/> Ser-109, Arg-185, Arg-458,<br/> Asp-111, Pro-110, Pro-117,<br/> Glu-424, Lys-116</p> |



|  |                                                              |  |
|--|--------------------------------------------------------------|--|
|  | (Ile-181)-C-H...O-Mo = 2.4 Å<br>(Pro-117)-C-H...O-Mo = 2.2 Å |  |
|--|--------------------------------------------------------------|--|
